# Supplementary material
Source: publisher figshare collection journal article supplement (https://frontiersin.figshare.com/ndownloader/files/25193360)
Supplement: Supplementary file [file 25193360]

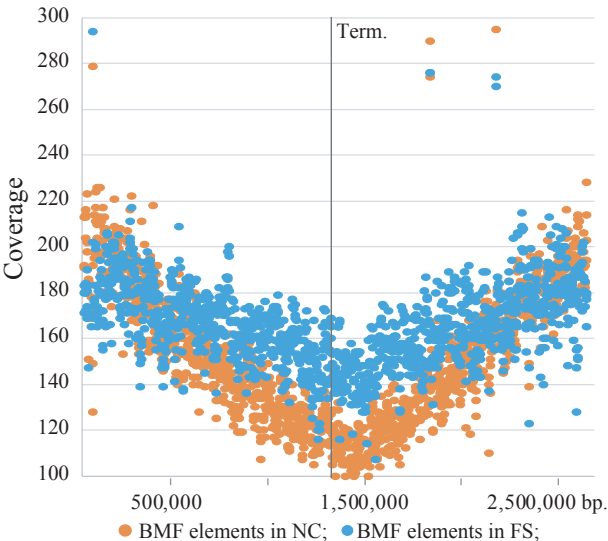

**Figure S1** | Distribution of coverage values in BMF elements.
